# Supplementary material for: Role of the serosa in intestinal anastomotic healing: insights from in-depth histological analysis of human and murine anastomoses
Source: PubMed Central journal article supplement — BJS Open. 2024 Sep 4;8(5):zrae108. doi: 10.1093/bjsopen/zrae108 (PMC11373408; doi:10.1093/bjsopen/zrae108), 2024-09-04
Supplement: zrae108_supplementary_data.pdf [file zrae108_supplementary_data.pdf]

## – Supplementary Information –

# The role of the serosa in intestinal anastomotic healing: insights from in-depth histologic analysis of human and murine anastomoses

### Original Report

**Marie-Christin Weber, MD<sup>1</sup>; Zoé Clees, MD<sup>1</sup>; Annalisa Buck, MSc<sup>1,2</sup>; Adrian Fischer, PhD<sup>3</sup>; Marcella Steffani, MD<sup>1</sup>; Dirk Wilhelm, MD<sup>1</sup>; Marc Martignoni, MD<sup>1</sup>, Helmut Friess, MD<sup>1</sup>; Yuval Rinkevich, PhD<sup>3</sup>; Philipp-Alexander Neumann, MD<sup>1,2</sup>**

<sup>1</sup>Department of Surgery, Technical University of Munich, TUM School of Medicine and Health, Munich, Germany

<sup>2</sup>Institute for Advanced Study, Technical University of Munich, Munich, Germany

<sup>3</sup>Helmholtz Institute of Regenerative Biology and Medicine at the Helmholtz Center, Munich, Germany

## 1. Supplementary materials and methods

### 2.1 Evaluation of anastomotic leakage

Anastomotic leakage was defined as macroscopically visible peritonitis or abscess formation around the anastomosis at sacrifice. Immediately prior to sacrifice, colonoscopy of the descending colon including the anastomosis was performed as described by previously described.<sup>1</sup>

### 2.2 Adhesion score

Regarding the presence of adhesions around the anastomosis, we scored the adhesion load according to the following parameters:

**Supplementary Table 1: Adhesion score**

| Criteria                                                               | Score points      |
|------------------------------------------------------------------------|-------------------|
| <b>Adhesion of uterus, small intestine, omentum, pancreas</b>          |                   |
| - no                                                                   | 0                 |
| - yes                                                                  | 1 point per organ |
| <b>Adhesion of other organs (gonadal fat, colon, peritoneum, etc.)</b> |                   |
| - no                                                                   | 0                 |
| - yes                                                                  | 1                 |
| <b>Removability of adhesions</b>                                       |                   |
| - no adhesions at all                                                  | 0                 |
| - all adhesions removable                                              | 1                 |
| - adhesions partially removable                                        | 2                 |
| - adhesions not removable                                              | 3                 |
| <b>Adhesions score = sum of all score points</b>                       |                   |

## 2. Supplementary results

### 2.1 Anastomotic leakage in murine model

None of the mice (n = 6 per time-point, total n= 24) showed macroscopically visible peritonitis or abscess formation around the anastomosis at sacrifice. All anastomoses were intact during colonoscopy prior to sacrifice.

### 2.2 Adhesion score

All anastomoses had some degree of adhesions. The mean adhesion score at POD3 was  $4.5 \pm 1.05$ ,  $4.7 \pm 0.82$  at POD7,  $4.8 \pm 0.75$  at POD14 and  $5.33 \pm 0.52$  at POD21 (**Supplementary Figure 1A**). The small intestine was the most common organ adherent to the anastomosis, followed adhesions from the omentum, pancreas and uterus (**Supplementary Figure 1B**).

### 3. Supplementary figures

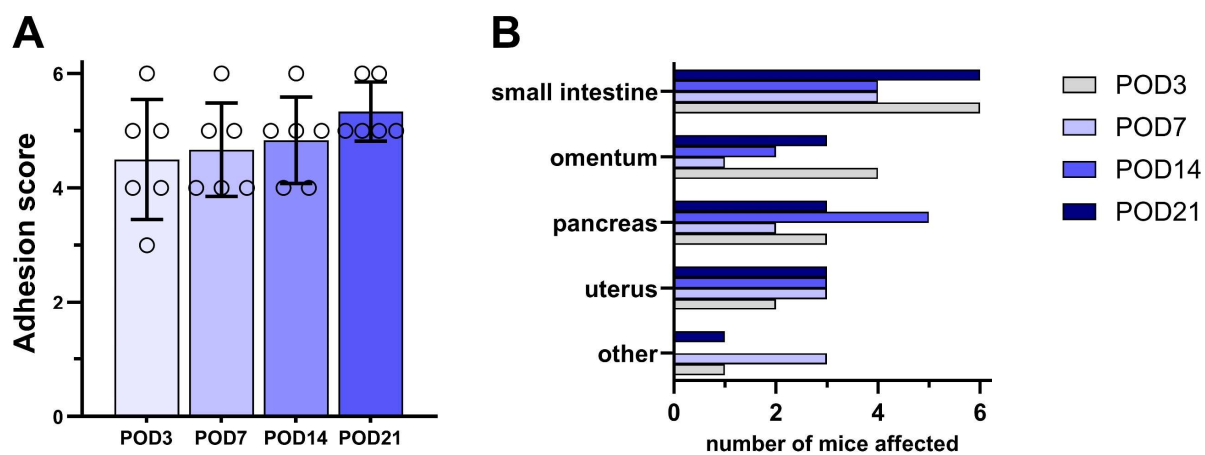

**Supplementary Figure 1: Adhesion score and distribution of adhesions according to the adherent organ. (A)** Adhesion score according to Supplementary Table 1. Differences between groups were not significant. One-way ANOVA with Tukey's multiple comparison test, data are mean  $\pm$  SD with dots for individual values. **(B)** Distribution of adhesions according to the adherent organ. X-axis = number of mice affected by adhesion. n = 6 per time-point.

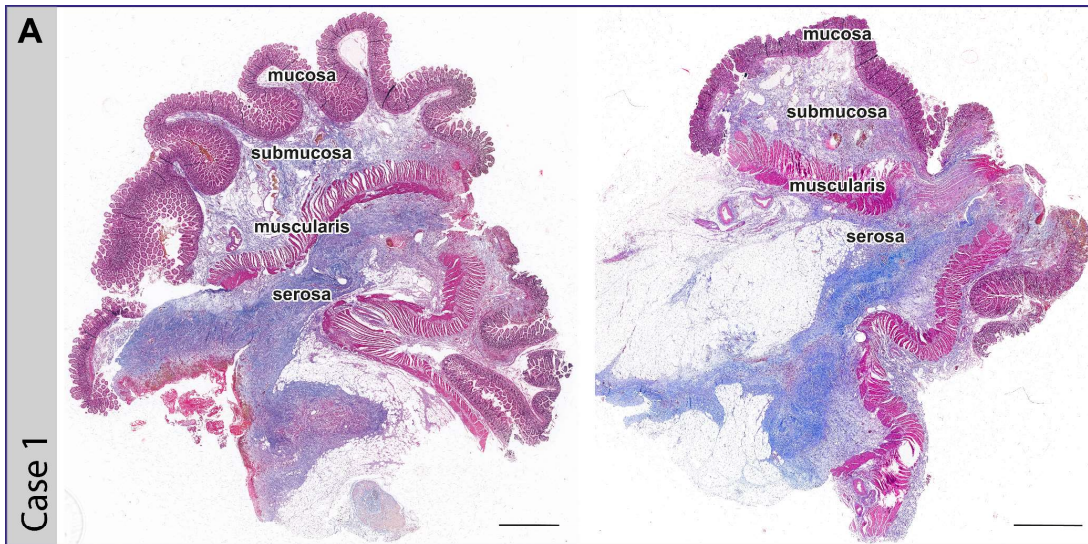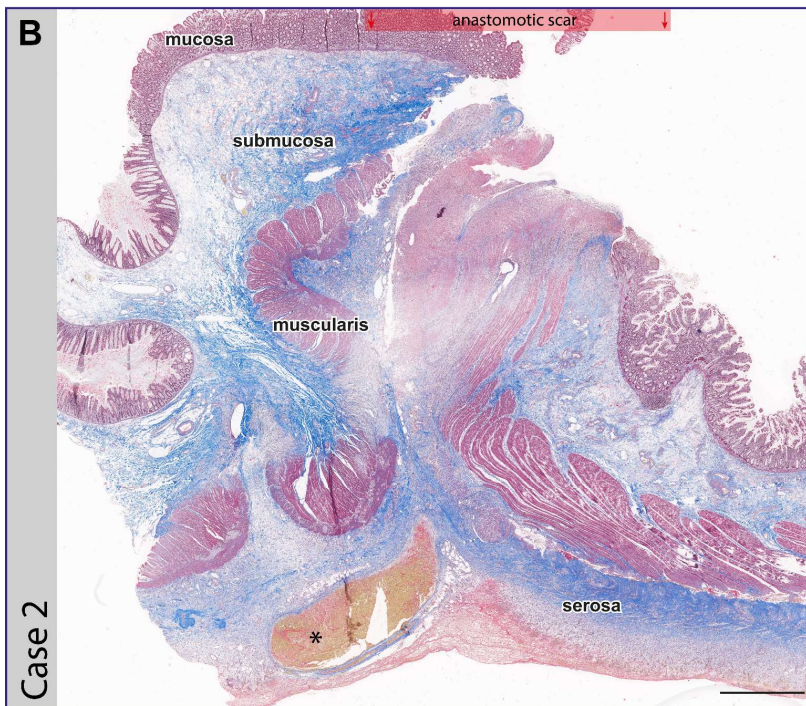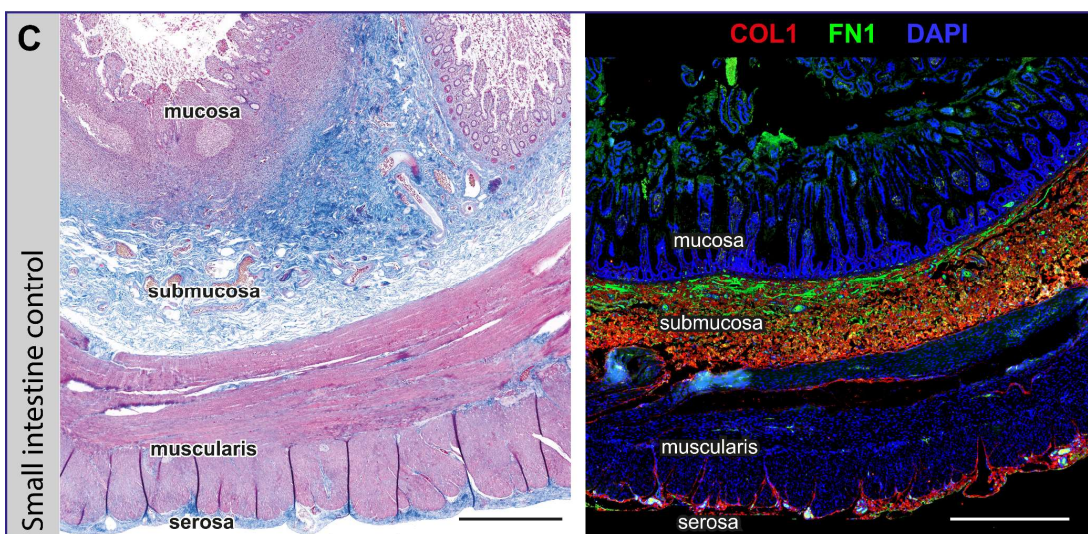

**Supplementary Figure 2: Histological evaluation of early postoperative human intestinal anastomosis and control small intestine. (A)** Two additional overview scans of Masson's trichrome-stained histologic section of human anastomosis (Case 1) on postoperative day (POD) 7. Scale bar = 2000 $\mu$ m, 400x magnification. **(B)** Overview scan of Masson's trichrome-stained histologic section of human anastomosis (Case 2) on POD9. \* = hematoma within serosal scar. Scale bar = 2000 $\mu$ m, 400x magnification. **(C)** Overview scans of Masson's trichrome as well as immunofluorescence [fibronectin (FN1) and type I collagen (COL1)] stained human small intestine control. Scale bar = 1000 $\mu$ m, 400x magnification (left), 100x magnification (right).



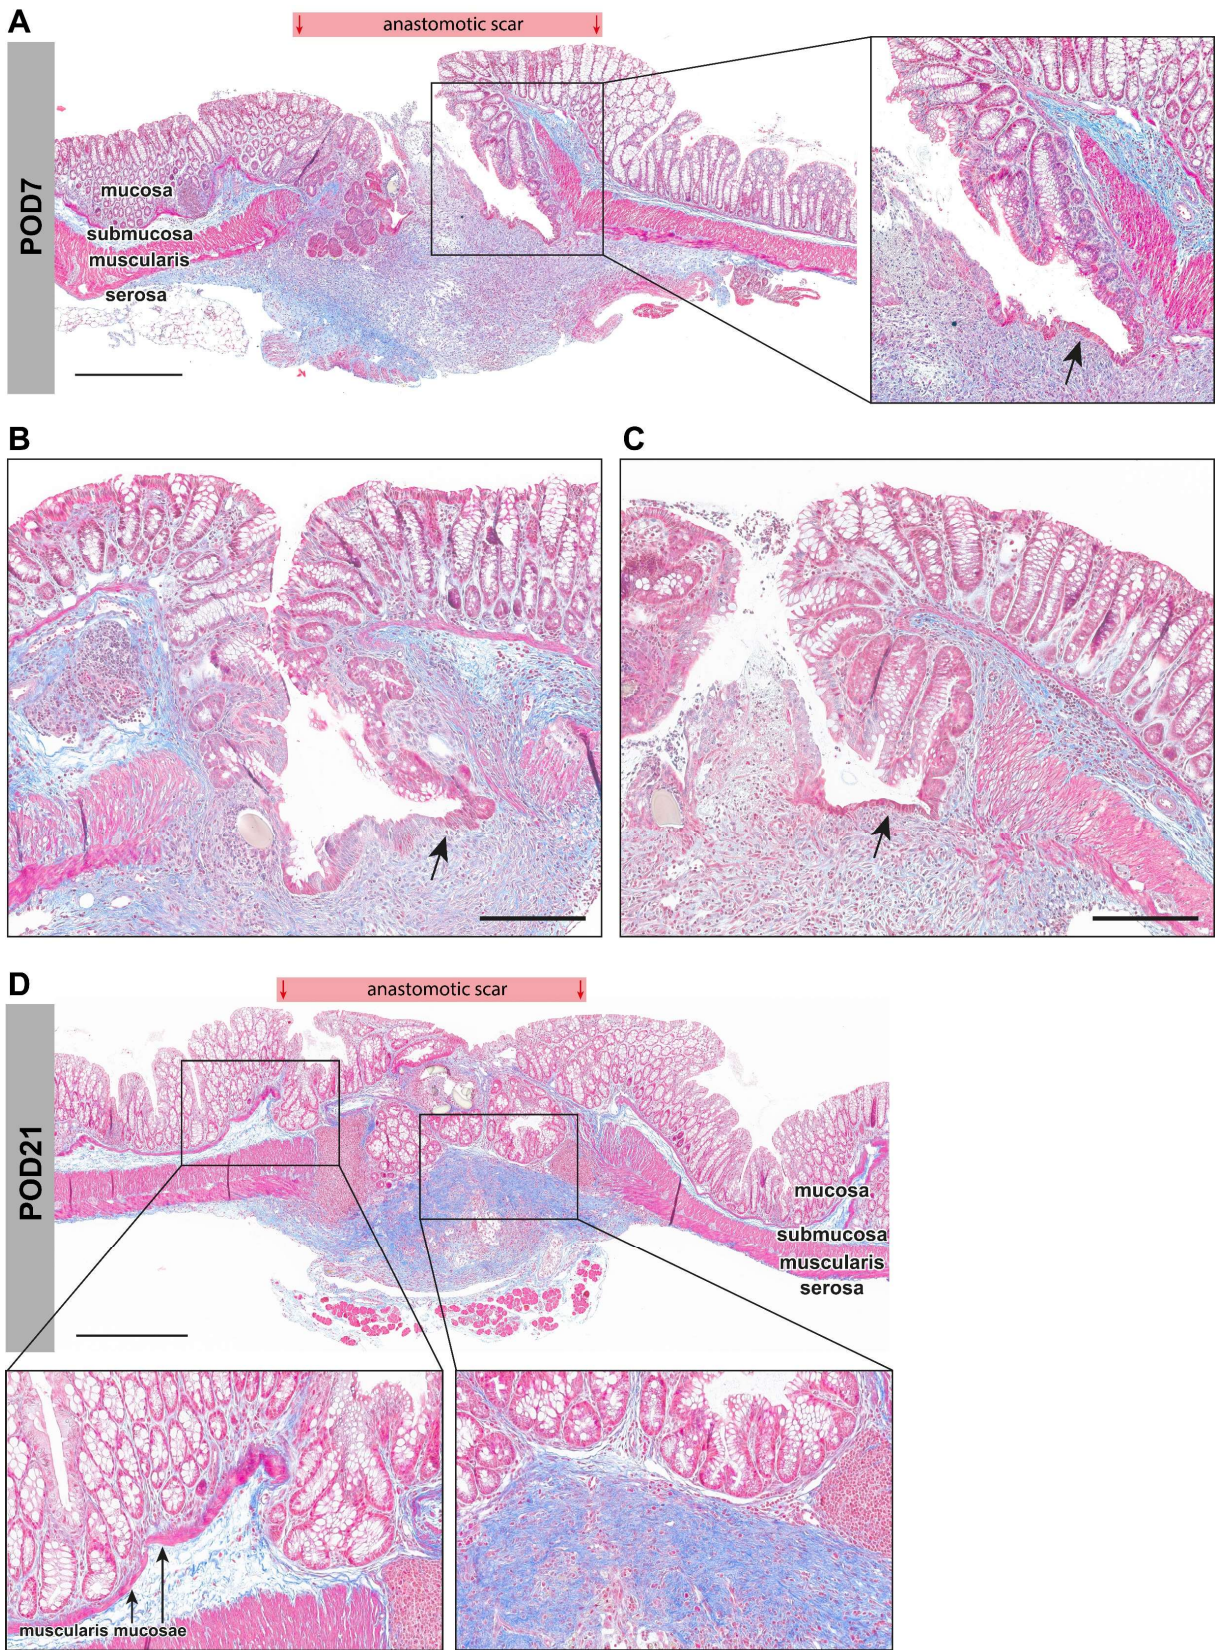

**Supplementary Figure 3: Details of histologic evaluation of murine anastomoses. (A)** At postoperative day 7 (POD7), the mucosal layer is not completely closed in most cases. It can be observed that a single layer of epithelial cells regenerates on top of the extracellular matrix within the anastomotic scar. Scale bar = 500 $\mu$ m, 400x magnification. (B+C) Two more representative images of epithelial regeneration within the anastomosis. Scale bar = 200 $\mu$ m, 400x magnification. (D) The gap and lack of closure of the muscularis layer is evident in the overview scans. It can also be seen that the lamina muscularis mucosae is absent within the anastomotic scar. Scale bar = 500 $\mu$ m, 400x magnification.



## POD14

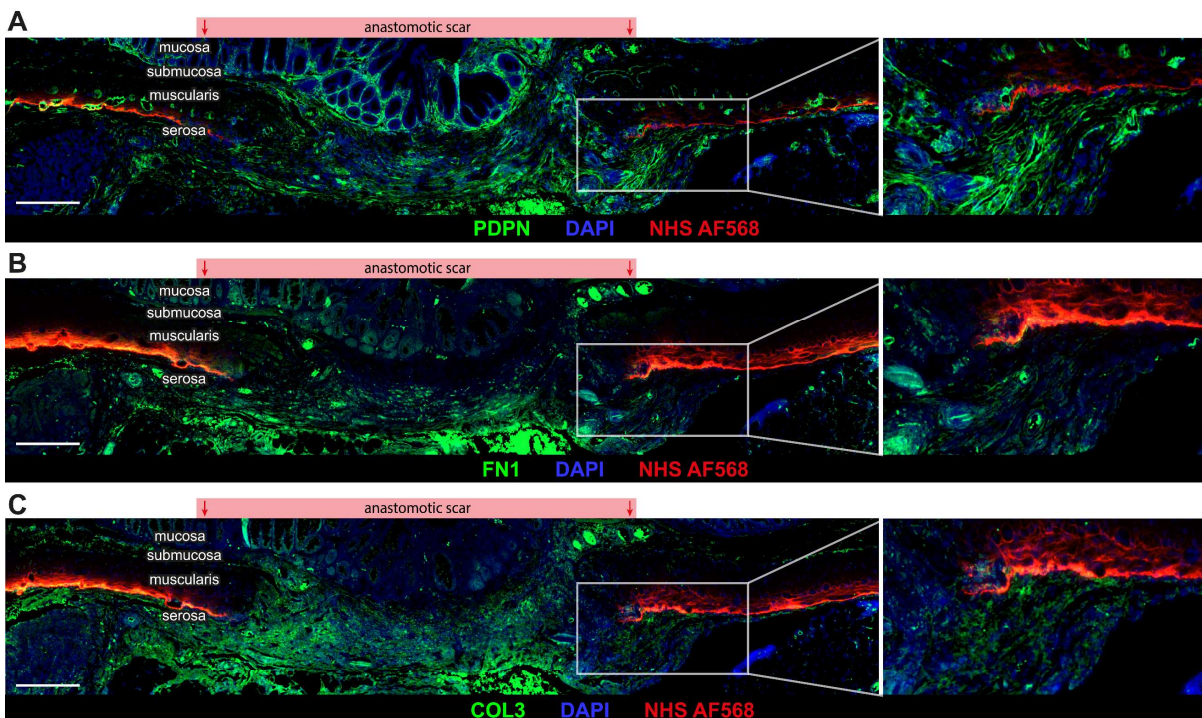

## POD21

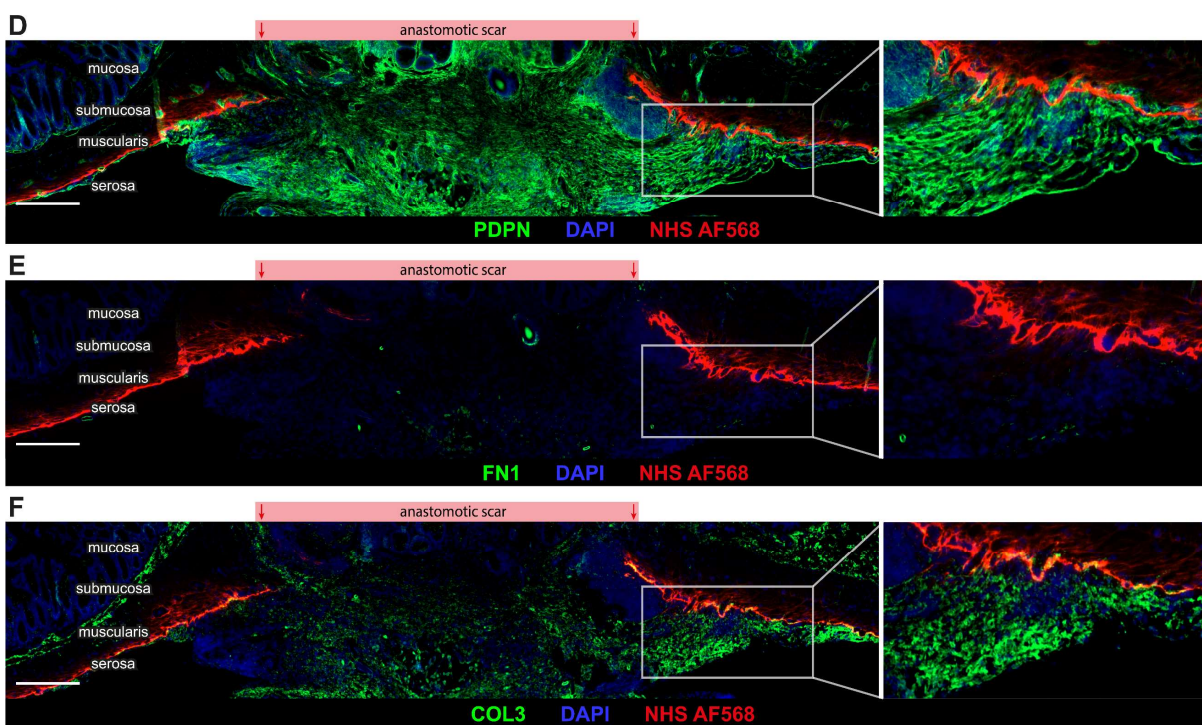

**Supplementary Figure 4: Serosal scar formation in murine anastomosis model.** *In vivo* serosal staining with NHS AF568 prior to anastomosis surgery and co-staining with **(A+D)** podoplanin (PDPN), **(B+E)** fibronectin (FN1) and **(C+F)** type III collagen (COL3). Representative images of anastomoses on postoperative days 14 (A-C) and 21 (D-F). Scale bar = 200 $\mu$ m, 100x magnification.

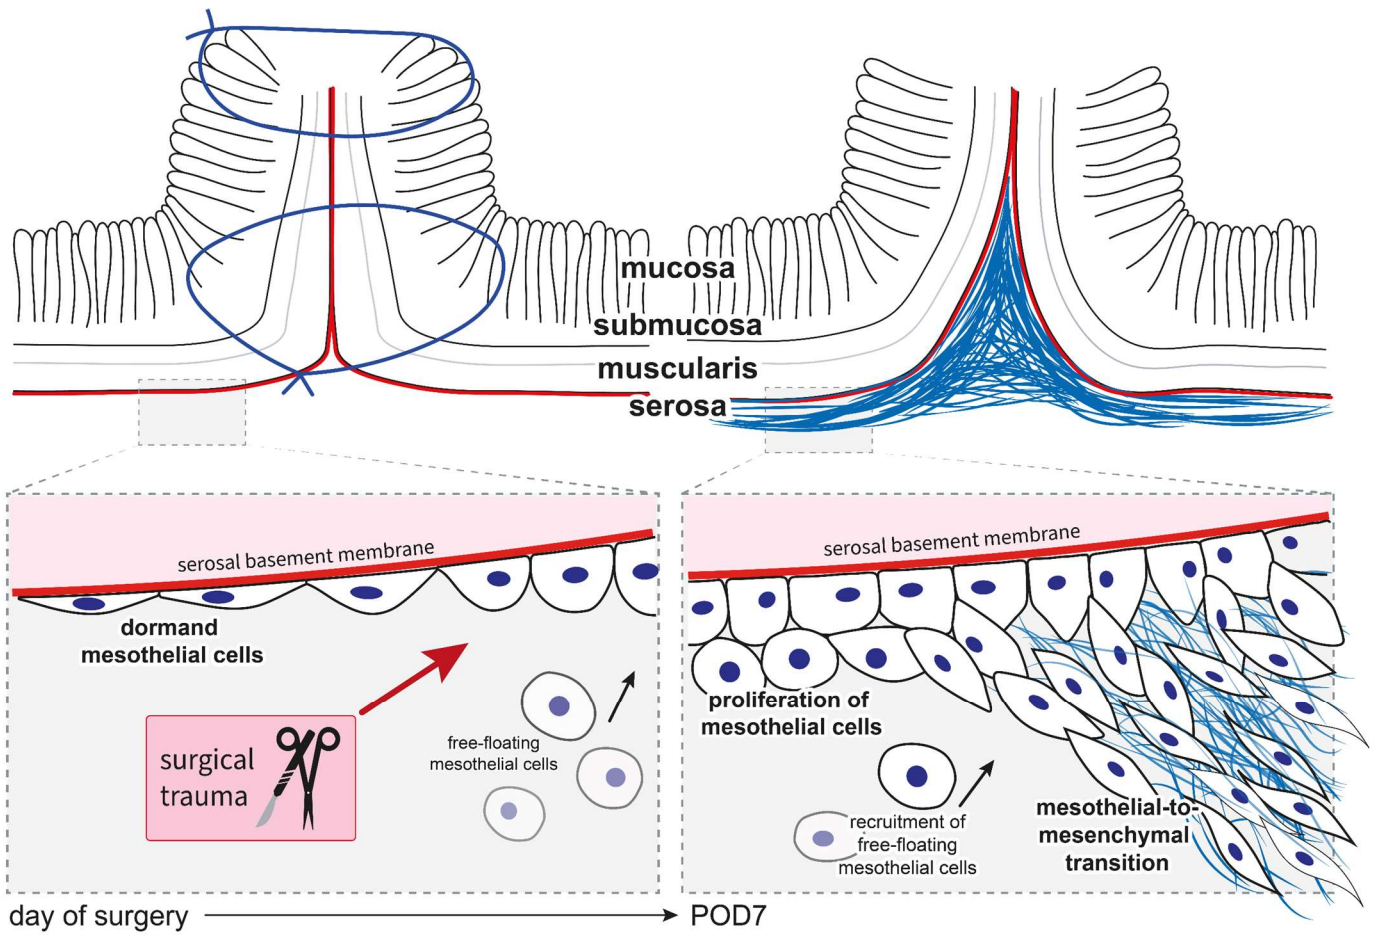

**Supplementary Figure 5: Hypothetical model of mesothelial cell involvement in healing of intestinal anastomosis.** We hypothesize that upon surgical trauma, local as well as free floating mesothelial cells proliferate and undergo mesothelial-to-mesenchymal transition (MMT) at the site of the anastomosis. Mesothelial cells thus initiate the production of extracellular matrix (ECM) for serosal scar formation during anastomotic healing in intestinal anastomoses.

## 4. Supplementary tables

**Supplementary Table 2: List of patient cases**

| Case | Age of anastomosis | Type of anastomosis       | Technique                                         | Current surgery (anastomosis resection)                                       |                                                                           | Previous surgery (anastomosis formation)                                                      |                                                                                      | Patient age |
|------|--------------------|---------------------------|---------------------------------------------------|-------------------------------------------------------------------------------|---------------------------------------------------------------------------|-----------------------------------------------------------------------------------------------|--------------------------------------------------------------------------------------|-------------|
|      |                    |                           |                                                   | Type of surgery                                                               | Reason for surgery                                                        | Type of surgery                                                                               | Reason for surgery                                                                   |             |
| 1    | 7 days             | jejunojejunal anastomosis | hand-sewn side-to-side double layered anastomosis | ileal resection including anastomosis                                         | bleeding at anastomosis                                                   | ileum segment resection due                                                                   | abdominal/peritoneal wall metastasis of colon cancer                                 | 73          |
| 2    | 9 days             | ileocolonic anastomosis   | hand-sewn side-to-side double layered anastomosis | oncologic right-sided hemicolectomy                                           | incidental histologic cancer finding                                      | ileocecal resection                                                                           | acute small bowel obstruction at ileocecal valve with suspected Crohn's Disease      | 70          |
| 3    | 1,5 years          | ileoileal anastomosis     | hand-sewn side-to-side double layered anastomosis | ileocecal resection including anastomosis                                     | Crohn's Disease: enterocutaneous fistula + stricturing ileitis terminalis | ileostomy closure                                                                             | protective ileostomy due to colon perforation in the context of Crohn's Disease      | 52          |
| 4    | 2 years            | colorectal anastomosis    | end-to-end circular stapled anastomosis           | tumor debulking with resection of transverse colon and colorectal anastomosis | ovarian cancer recurrence                                                 | tumor debulking including left sided hemicolectomy and lower anterior resection of the rectum | ovarian cancer                                                                       | 53          |
| 5    | 3 years            | ileoileal anastomosis     | hand-sewn side-to-side double layered anastomosis | ileal resection including anastomosis                                         | small bowel obstruction distal of anastomosis                             | ileostomy closure                                                                             | protective ileostomy for lower anterior resection of the rectum due to rectal cancer | 80          |
| 6    | 7 years            | ileoileal anastomosis     | data not available                                | ileocecal resection including anastomosis                                     | Crohn's Disease: stricture at ileocecal valve                             | ileum segment resection                                                                       | stricturing Crohn's Disease                                                          | 52          |
| 7    | 16 years           | ileocolonic anastomosis   | data not available                                | Right-sided hemicolectomy                                                     | Crohn's Disease: stricture colon ascendense/transversum                   | ileocecal resection                                                                           | stricturing Crohn's Disease                                                          | 57          |



## 6. References

1. Miltschitzky JRE, Clees Z, Weber MC, et al. Intestinal anastomotic healing models during experimental colitis. *International journal of colorectal disease*. 2021;36(10):2247-59.
